# Supplementary material for: Characteristics and Determinants of Partial Remission in Children with Type 1 Diabetes Using the Insulin-Dose-Adjusted A1C Definition
Source: PubMed Central journal article supplement (PMC4164125; doi:10.1155/2014/851378), 2014-08-31
Supplement: 851378.f1.pdf [file 851378.f1.pdf]

## **Supporting Information**

### **Characteristics And Determinants Of Partial Remission In Children With Type 1**

#### **Diabetes using the Insulin-Dose-Adjusted A1C Definition**

Aurore Pecheur, Thierry Barrea, Valérie Vandooren, Véronique Beauloye, Annie

Robert, Philippe A. Lysy

Figure S1

A

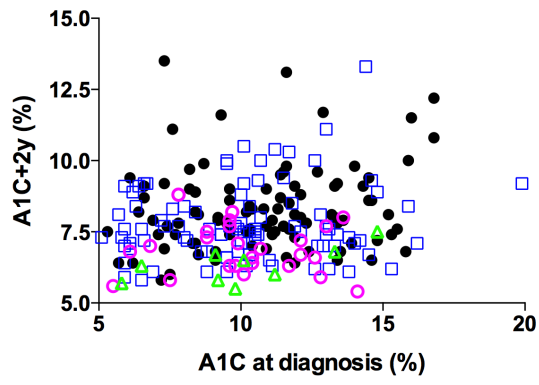

B

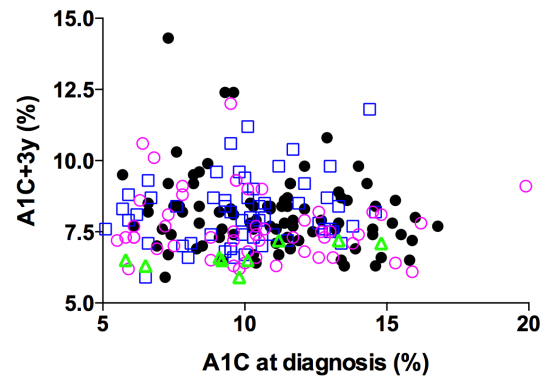

- No PR
- PR <364 d
- PR 365-729 d
- △ PR >729 d

**Figure S1: Influence of A1C levels at diagnosis on PR duration and A1C at 2 years follow-up**

Graphs showing no correlation between A1C levels at diagnosis, PR duration subgroups and A1C+2y (**A**) or A1C+3y (**B**).

**Table S1**

|                    | <b>Total<br/>(IU/mL)</b> | <b>PR<br/>(IU/mL)</b> | <b>No PR<br/>(IU/mL)</b> | <b><i>P</i></b> |
|--------------------|--------------------------|-----------------------|--------------------------|-----------------|
| $\alpha$ GAD65 Abs | 4.5 (0.0 – 275.0)        | 4.7 (0.0 – 275.0)     | 4.5 (0.0 – 214.8)        | 0.99            |
| Girls              | 4.9 (0. – 96.3)          | 4.8 (0.0 – 71.6)      | 5.1 (0.0 – 96.3)         | 0.74            |
| Boys               | 2.3 (0.0 – 275.0)        | 2.7 (0.0 – 275.0)     | 2.3 (0.0 – 214.8)        | 0.78            |
| 0-4 yr             | 2.5 (0.0 – 214.8)        | 0.68 (0.0 – 9.3)      | 5.6 (0.0 – 214.8)        | 0.06            |
| 5-9 yr             | 4.2 (0.0 – 149.0)        | 4.4 (0.0 – 55.5)      | 2.3 (0.0 – 149.0)        | 0.98            |
| >10 yr             | 4.9 (0.0 – 275.0)        | 5.5 (0.0 – 275.0)     | 4.5 (0.0 – 96.3)         | 0.41            |
|                    | <b>Total<br/>(IU/mL)</b> | <b>PR<br/>(IU/mL)</b> | <b>No PR<br/>(IU/mL)</b> | <b><i>P</i></b> |
| $\alpha$ IA2 Abs   | 4.5 (0.0 – 93.0)         | 2.7 (0.0 – 93.0)      | 5.3 (0.0 – 71.7)         | 0.31            |
| Girls              | 2.4 (0.0 – 48.9)         | 2.3 (0.0 – 48.9)      | 3.2 (0.0 – 28.7)         | 0.84            |
| Boys               | 5.2 (0.0 – 93.0)         | 3.1 (0.0 – 93.0)      | 15.7 (0.0 – 71.7)        | 0.18            |
| 0-4 yr             | 4.5 (0.0 – 71.7)         | 4.5 (0.0 – 22.6)      | 22.6 (0.3 – 71.7)        | 0.62            |
| 5-9 yr             | 5.3 (0.0 – 93.0)         | 2.4 (0.0 – 93.0)      | 9.3 (0.6 – 24.3)         | 0.47            |
| >10 yr             | 9.6 (0.0 – 44.2)         | 1.8 (0.0 – 44.2)      | 4.5 (0.0 – 28.7)         | 0.79            |

Data are expressed as median with range. Antibody titers were analyzed using Mann-Whitney test.  $\alpha$ : anti-; abs: antibodies.

**Table S2**

|                             | <b>Abdul-Rasoul 2006</b>                                                                                    | <b>Dost 2007</b>                                    | <b>Bowden 2008</b>                                                                         | <b>Mortensen 2009</b>                                          | <b>Neylon 2013</b>                                                         |
|-----------------------------|-------------------------------------------------------------------------------------------------------------|-----------------------------------------------------|--------------------------------------------------------------------------------------------|----------------------------------------------------------------|----------------------------------------------------------------------------|
| Study center(s)             | Kuwait                                                                                                      | Germany                                             | Ohio, USA                                                                                  | 15 countries                                                   | Australia                                                                  |
| Study design                | Prospective                                                                                                 | Retrospective                                       | Retrospective                                                                              | Prospective                                                    | Retrospective                                                              |
| Enrollment dates            | 4/2000 – 5/2003                                                                                             |                                                     | 1/2004 – 12/2004                                                                           | 8/1999 – 12/2000                                               | 1/2005 – 1/2006                                                            |
| <i>n</i>                    | 103                                                                                                         | 6123                                                | 152                                                                                        | 275                                                            | 109                                                                        |
| Age – yr                    | 6.6 ± 3.9 (<12)                                                                                             | <18                                                 | 3 subgroups<br>(< 5, 5-12, >12)                                                            | 9.2 ± 3.7 (<16)                                                | 9.0 ± 3.4                                                                  |
| Female                      | 62.1%                                                                                                       |                                                     | 33.3 to 50%                                                                                | ND                                                             | 45%                                                                        |
| PR characteristics          |                                                                                                             |                                                     |                                                                                            |                                                                |                                                                            |
| Definition                  | DIR <0.5 U/kg + A1C ≤6%                                                                                     | DIR <0.5 U/kg + A1C ≤7%                             | DIR <0.5 U/kg + A1C <8%                                                                    | IDAA1C                                                         | IDAA1C                                                                     |
| Occurrence                  | 68.9%                                                                                                       | 32.5%                                               | <5 yr: 26.8%;<br>5-12 yr: 56.6%;<br>>12 yr: 29.4%                                          | <4.9 yr: ≈45%;<br>5-9.9 yr: ≈60%;<br>≥10 yr: ≈70%              | 35%                                                                        |
| Duration                    | 7.2 months (95% CI, 2.3-12.3)                                                                               | 0.74 ± 0.77 yr                                      | ND (12 month follow-up)                                                                    | ND (12 month follow-up)                                        | 8 months (range 3-26)                                                      |
| Independent PR determinants | (+) age 5-12 yr<br>(-) DKA (no DKA = 100% PR)<br>(-) duration of symptoms before Δ<br>(-) BG, acidosis at Δ | (+) Boys (< 10 yr)<br>(+) Puberty<br>(-) age <10 yr | (+) No DKA at Δ<br>(-) age <5 yr and >12 yr                                                | (+) stimulated C-peptide at 6 and 12 months<br>(-) age <4.9 yr | (+) age ( <i>r</i> = 0.26)                                                 |
| Remarks                     | - no gender differences<br>- no PR in patients <3 yr<br>- 4% total remission<br>- DKA 84.5%                 |                                                     | - DKA 27.4 to 46.3%<br>- No correlation between gender or BG, Abs and A1C at Δ and PR rate |                                                                | - no PR in patients <3.5 yr<br>- more DKA in patients <3.5 yr<br>- DKA 33% |

Abs: antibodies; BG: blood glucose; Δ: diagnosis; DIR: daily insulin requirements; ND: not determined.
